# Supplementary material for: Controlling the growth of low dimension nanostructures of an iridium complex
Source: Royal Society of Chemistry journal article supplement (doi:10.1039/c0dt01128b), 2010-12-10
Supplement: c0dt01128b.pdf [file c0dt01128b.pdf]

## Electronic Supplementary Information (ESI) For: Controlling growth of low dimension nanostructures of iridium complex

Haowei Lin<sup>a,b</sup>, Huibiao Liu<sup>\*a</sup>, Xuemin Qian<sup>a</sup>, Canbin Ouyang<sup>a</sup>, Yuliang Li<sup>\*a</sup>

Received (in XXX, XXX) Xth XXXXXXXXXX 201X, Accepted Xth XXXXXXXXXX 201X

First published on the web Xth XXXXXXXXXX 201X

DOI: 10.1039/b000000x

<sup>a</sup>CAS Key Laboratory of Organic Solids, Beijing National Laboratory for Molecular Sciences (BNLMS), Institute of Chemistry, Chinese Academy of Sciences, Beijing, 100190, P. R. China.

<sup>b</sup>Graduate University of Chinese Academy of Sciences, Beijing 100190, P.R. China.

E-mail: [ylli@iccas.ac.cn](mailto:ylli@iccas.ac.cn), [liuhb@iccas.ac.cn](mailto:liuhb@iccas.ac.cn).

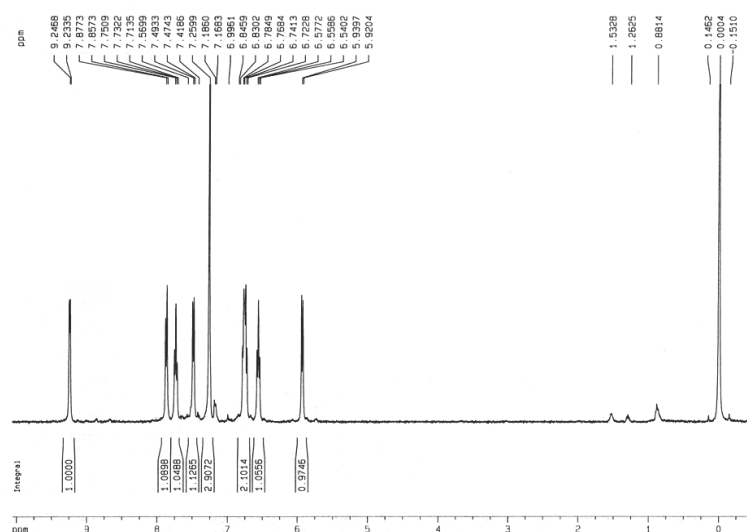

**Fig. S1** <sup>1</sup>H NMR spectrum of IPPC in trichloromethane-d, ppm: 9.23 (1H), 7.86 (1H), 7.73 (1H), 7.47 (1H), 6.83(2H), 6.56 (1H), 5.92 (1H).

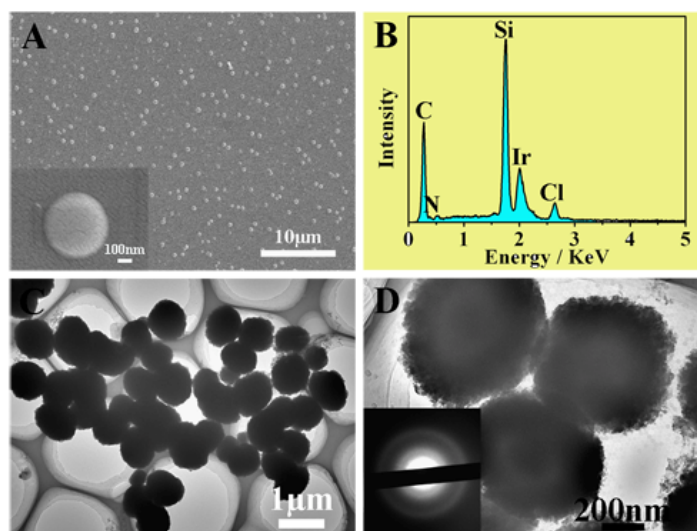

**Fig. S2** SEM images of IPPC nanoparticles: (A) top view of a mass of IPPC nanoparticles; The inset in (A) is the SEM image of a single IPPC nanoparticle; (B) EDS pattern of IPPC nanoparticle. TEM images of IPPC nanoparticles: (C) IPPC nanoparticles; (D) a few IPPC nanoparticles under a higher magnification. The inset in (D) is the SAED pattern taken from IPPC nanoparticle.
